# Supplementary material for: Propolis as a Cariostatic Agent in Lozenges and Impact of Storage Conditions on the Stability of Propolis
Source: MDPI journal article supplement (doi:10.3390/pharmaceutics15061768), 2023-06-19
Supplement: s1 [file s1]

# Propolis as a Cariostatic Agent in Lozenges and Impact of Storage Conditions on the Stability of Propolis

Anna Kurek-Górecka <sup>1,\*</sup>, Paweł Ramos <sup>2</sup>, Małgorzata Klósek <sup>3</sup>, Elżbieta Bobela <sup>3</sup>, Zenon P. Czuba <sup>3</sup>, Radosław Balwierz <sup>4</sup> and Paweł Olczyk <sup>1</sup>

<sup>1</sup> Department of Community Pharmacy, Faculty of Pharmaceutical Sciences in Sosnowiec, Medical University of Silesia in Katowice, Kasztanowa 3, 41-200 Sosnowiec, Poland; polczyk@sum.edu.pl

<sup>2</sup> Department of Biophysics, Faculty of Pharmaceutical Sciences in Sosnowiec, Medical University of Silesia in Katowice, Jedności 8, 41-200 Sosnowiec, Poland; pawelramos@sum.edu.pl

<sup>3</sup> Department of Microbiology and Immunology, Faculty of Medical Sciences in Zabrze, Medical University of Silesia in Katowice, Jordana 19, 41-808 Zabrze, Poland; mklosek@sum.edu.pl (M.K.); ebobela@sum.edu.pl (E.B.); zczuba@sum.edu.pl (Z.P.C.)

<sup>4</sup> Institute of Chemistry, University of Opole, Oleska 48, 45-052 Opole, Poland; radoslaw.balwierz@uni.opole.pl

\* Correspondence: akurekgorecka@sum.edu.pl

| Table of content                                                                                                                                                 | p. |
|------------------------------------------------------------------------------------------------------------------------------------------------------------------|----|
| <b>Table S1.</b> Photos presenting 96-well plates and plates with broth made to determine the minimum bactericidal concentration for EEP.                        | 2  |
| <b>Table S2.</b> Results of main effect of ANOVA analysis for MIC of tested EEP concentrations.                                                                  | 4  |
| <b>Table S3.</b> Results of main effect of ANOVA analysis for MIC values of tested lozenges.                                                                     | 4  |
| <b>Table S4.</b> Results of Fisher's LSD Test for <i>S. mitis</i> MIC values of tested lozenges.                                                                 | 5  |
| <b>Table S5.</b> Results of Fisher's LSD Test for <i>S. mutans</i> MIC values of tested lozenges.                                                                | 6  |
| <b>Table S6.</b> Results of Fisher's LSD Test for <i>S. oralis</i> MIC values of tested lozenges.                                                                | 7  |
| <b>Table S7.</b> Results of Fisher's LSD Test for <i>S. salivarius</i> MIC values of tested lozenges.                                                            | 8  |
| <b>Table S8.</b> Photos presenting 96-well plates and plates with broth made to determine the minimum bactericidal concentration for prepared lozenges with EEP. | 9  |

**Table S1.** Photos presenting 96-well plates and plates with broth made to determine the minimum bactericidal concentration for EEP.

| Bacteria                    | Photos of the plate presenting strains bacteria tested                             | Photos of the 96-well microtiter plates used to determination of the Minimum Inhibitory Concentration and Minimum Bactericidal Concentration of EEP |                                                                                      |
|-----------------------------|------------------------------------------------------------------------------------|-----------------------------------------------------------------------------------------------------------------------------------------------------|--------------------------------------------------------------------------------------|
| <i>Streptococcus mitis</i>  |   |                                                                   |   |
| <i>Streptococcus mutans</i> |  |                                                                  |  |

*Streptococcus oralis*

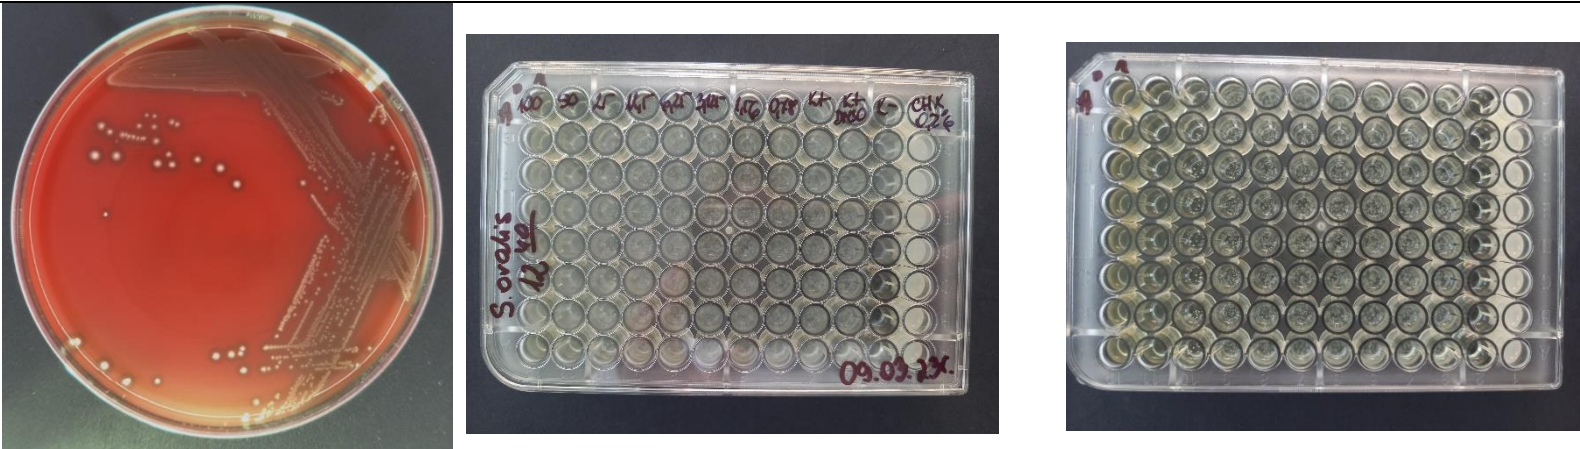

*Streptococcus salivarius*

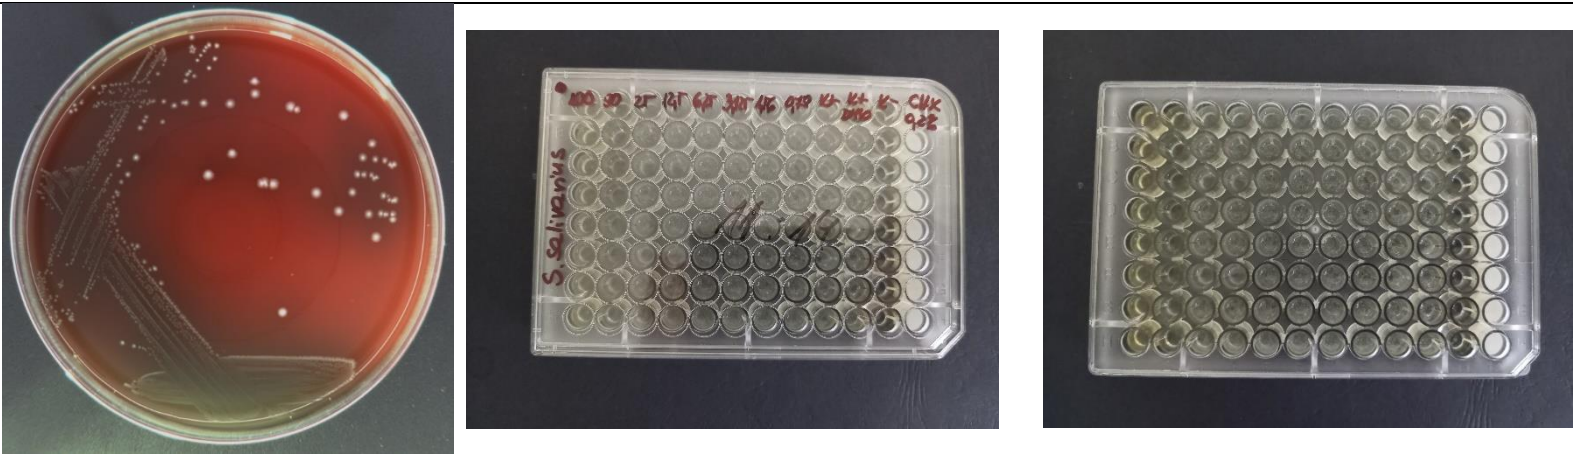

**Table S2.** Results of main effect of ANOVA analysis for MIC of tested EEP concentrations.

| Effect      | Multivariate Tests of Significance<br>Sigma-restricted parameterization<br>Effective hypothesis decomposition |          |          |           |          |
|-------------|---------------------------------------------------------------------------------------------------------------|----------|----------|-----------|----------|
|             | Test                                                                                                          | Value    | F        | Effect df | Error df |
| Intercept   | Wilks                                                                                                         | 0,001428 | 14160,06 | 4         | 81,0000  |
| Formulation | Wilks                                                                                                         | 0,000079 | 76,57    | 44        | 311,8403 |

Results marked in red are statistically significant at the level  $p \leq 0.05$ .

**Table S3.** Results of main effect of ANOVA analysis for MIC values of tested lozenges.

| Effect      | Multivariate Tests of Significance0<br>Sigma-restricted parameterization<br>Effective hypothesis decomposition |          |          |           |          |
|-------------|----------------------------------------------------------------------------------------------------------------|----------|----------|-----------|----------|
|             | Test                                                                                                           | Value    | F        | Effect df | Error df |
| Intercept   | Wilks                                                                                                          | 0,004078 | 4762,232 | 4         | 78,0000  |
| Formulation | Wilks                                                                                                          | 0,003115 | 48,173   | 24        | 273,3195 |

\* Results marked in red are statistically significant at the level  $p \leq 0.05$ .

**Table S4.** Results of Fisher's LSD Test for *S. mitis* MIC values of tested lozenges.

| LSD test; variable <i>S. mitis</i>                                       |                                 |               |               |               |               |               |               |               |
|--------------------------------------------------------------------------|---------------------------------|---------------|---------------|---------------|---------------|---------------|---------------|---------------|
| Probabilities for Post Hoc Tests Error: Between MS = .00048. df = 49.000 |                                 |               |               |               |               |               |               |               |
| Cell No.                                                                 | Formulation                     | {1}<br>.29812 | {2}<br>.28412 | {3}<br>.27088 | {4}<br>.35012 | {5}<br>.04212 | {6}<br>.06425 | {7}<br>.04037 |
| 1                                                                        | PT                              |               | 0.206348      | 0.016107      | 0.000018      | 0.000000      | 0.000000      | 0.000000      |
| 2                                                                        | PT/HT                           | 0.206348      |               | 0.231311      | 0.000000      | 0.000000      | 0.000000      | 0.000000      |
| 3                                                                        | PT/UV30m                        | 0.016107      | 0.231311      |               | 0.000000      | 0.000000      | 0.000000      | 0.000000      |
| 4                                                                        | PT/UV60m                        | 0.000018      | 0.000000      | 0.000000      |               | 0.000000      | 0.000000      | 0.000000      |
| 5                                                                        | Control (saliva & bacteria)     | 0.000000      | 0.000000      | 0.000000      | 0.000000      |               | 0.048454      | 0.873476      |
| 6                                                                        | Control (tablets WP & bacteria) | 0.000000      | 0.000000      | 0.000000      | 0.000000      | 0.048454      |               | 0.033782      |
| 7                                                                        | Control (saliva)                | 0.000000      | 0.000000      | 0.000000      | 0.000000      | 0.873476      | 0.033782      |               |

Results marked in red are statistically significant at the level  $p \leq 0.05$ .



**Table S5.** Results of Fisher's LSD Test for *S. mutans* MIC values of tested lozenges.

| LSD test; variable <i>S. mutans</i>                                      |                                 |               |               |               |               |               |               |               |
|--------------------------------------------------------------------------|---------------------------------|---------------|---------------|---------------|---------------|---------------|---------------|---------------|
| Probabilities for Post Hoc Tests Error: Between MS = .00267. df = 49.000 |                                 |               |               |               |               |               |               |               |
| Cell No.                                                                 | Formulation                     | {1}<br>1.3363 | {2}<br>1.1121 | {3}<br>1.0305 | {4}<br>1.1420 | {5}<br>.05487 | {6}<br>.08238 | {7}<br>.05237 |
| 1                                                                        | PT                              |               | 0.000000      | 0.000000      | 0.000000      | 0.000000      | 0.000000      | 0.000000      |
| 2                                                                        | PT/HT                           | 0.000000      |               | 0.002725      | 0.253465      | 0.000000      | 0.000000      | 0.000000      |
| 3                                                                        | PT/UV30m                        | 0.000000      | 0.002725      |               | 0.000078      | 0.000000      | 0.000000      | 0.000000      |
| 4                                                                        | PT/UV60m                        | 0.000000      | 0.253465      | 0.000078      |               | 0.000000      | 0.000000      | 0.000000      |
| 5                                                                        | Control (saliva & bacteria)     | 0.000000      | 0.000000      | 0.000000      | 0.000000      |               | 0.292681      | 0.923359      |
| 6                                                                        | Control (tablets WP & bacteria) | 0.000000      | 0.000000      | 0.000000      | 0.000000      | 0.292681      |               | 0.251511      |
| 7                                                                        | Control (saliva)                | 0.000000      | 0.000000      | 0.000000      | 0.000000      | 0.923359      | 0.251511      |               |

Results marked in red are statistically significant at the level  $p \leq 0.05$ .

**Table S6.** Results of Fisher's LSD Test for *S. oralis* MIC values of tested lozenges.

| LSD test; variable <i>S. oralis</i>                                      |                                 |               |               |               |               |               |               |               |
|--------------------------------------------------------------------------|---------------------------------|---------------|---------------|---------------|---------------|---------------|---------------|---------------|
| Probabilities for Post Hoc Tests Error: Between MS = .00116. df = 49.000 |                                 |               |               |               |               |               |               |               |
| Cell No.                                                                 | Formulation                     | {1}<br>1.2576 | {2}<br>1.0605 | {3}<br>.98200 | {4}<br>1.1495 | {5}<br>.05475 | {6}<br>.11000 | {7}<br>.05275 |
| 1                                                                        | PT                              |               | 0.000000      | 0.000000      | 0.000000      | 0.000000      | 0.000000      | 0.000000      |
| 2                                                                        | PT/HT                           | 0.000000      |               | 0.000029      | 0.000004      | 0.000000      | 0.000000      | 0.000000      |
| 3                                                                        | PT/UV30m                        | 0.000000      | 0.000029      |               | 0.000000      | 0.000000      | 0.000000      | 0.000000      |
| 4                                                                        | PT/UV60m                        | 0.000000      | 0.000004      | 0.000000      |               | 0.000000      | 0.000000      | 0.000000      |
| 5                                                                        | Control (saliva & bacteria)     | 0.000000      | 0.000000      | 0.000000      | 0.000000      |               | 0.002121      | 0.906979      |
| 6                                                                        | Control (tablets WP & bacteria) | 0.000000      | 0.000000      | 0.000000      | 0.000000      | 0.002121      |               | 0.001507      |
| 7                                                                        | Control (saliva)                | 0.000000      | 0.000000      | 0.000000      | 0.000000      | 0.906979      | 0.001507      |               |

Results marked in red are statistically significant at the level  $p \leq 0.05$ .

**Table S7.** Results of Fisher's LSD Test for *S. salivarius* MIC values of tested lozenges.

| LSD test; variable <i>S. salivarius</i>                                  |                                 |               |               |               |               |               |               |               |
|--------------------------------------------------------------------------|---------------------------------|---------------|---------------|---------------|---------------|---------------|---------------|---------------|
| Probabilities for Post Hoc Tests Error: Between MS = .00583. df = 49.000 |                                 |               |               |               |               |               |               |               |
| Cell No.                                                                 | Formulation                     | {1}<br>1.3731 | {2}<br>1.1195 | {3}<br>1.0253 | {4}<br>1.1885 | {5}<br>.05262 | {6}<br>.09975 | {7}<br>.05237 |
| 1                                                                        | PT                              |               | 0.000000      | 0.000000      | 0.000014      | 0.000000      | 0.000000      | 0.000000      |
| 2                                                                        | PT/HT                           | 0.000000      |               | 0.017122      | 0.076924      | 0.000000      | 0.000000      | 0.000000      |
| 3                                                                        | PT/UV30m                        | 0.000000      | 0.017122      |               | 0.000088      | 0.000000      | 0.000000      | 0.000000      |
| 4                                                                        | PT/UV60m                        | 0.000014      | 0.076924      | 0.000088      |               | 0.000000      | 0.000000      | 0.000000      |
| 5                                                                        | Control (saliva & bacteria)     | 0.000000      | 0.000000      | 0.000000      | 0.000000      |               | 0.223073      | 0.994803      |
| 6                                                                        | Control (tablets WP & bacteria) | 0.000000      | 0.000000      | 0.000000      | 0.000000      | 0.223073      |               | 0.220665      |
| 7                                                                        | Control (saliva)                | 0.000000      | 0.000000      | 0.000000      | 0.000000      | 0.994803      | 0.220665      |               |

Results marked in red are statistically significant at the level  $p \leq 0.05$ .



**Table S8.** Photos presenting 96-well plates and plates with broth made to determine the minimum bactericidal concentration for prepared lozenges with EEP.

| Bacteria                    | Photos of the 96-well microtiter plates used to determination of the Minimum Inhibitory Concentration and Minimum Bactericidal Concentration of EEP |                                                                                      |
|-----------------------------|-----------------------------------------------------------------------------------------------------------------------------------------------------|--------------------------------------------------------------------------------------|
| <i>Streptococcus mitis</i>  | 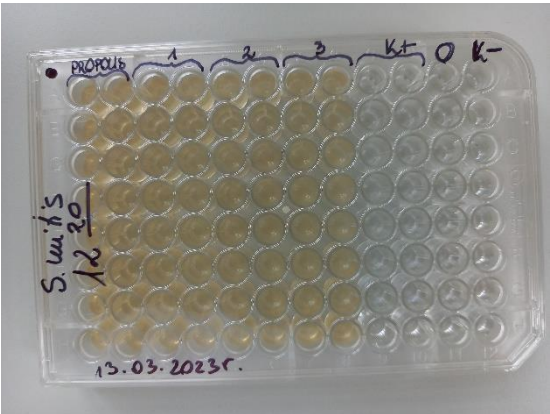                                                                  |   |
| <i>Streptococcus mutans</i> |                                                                  |  |

*Streptococcus oralis*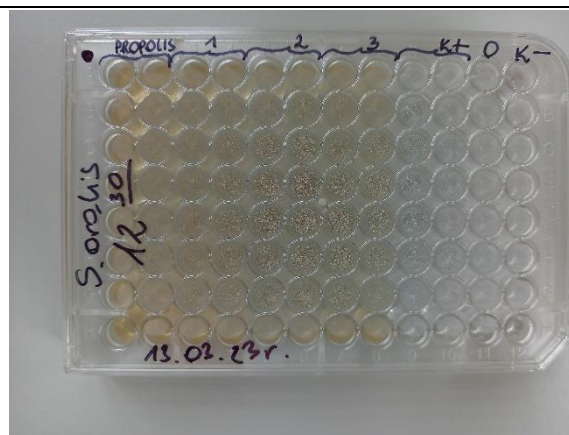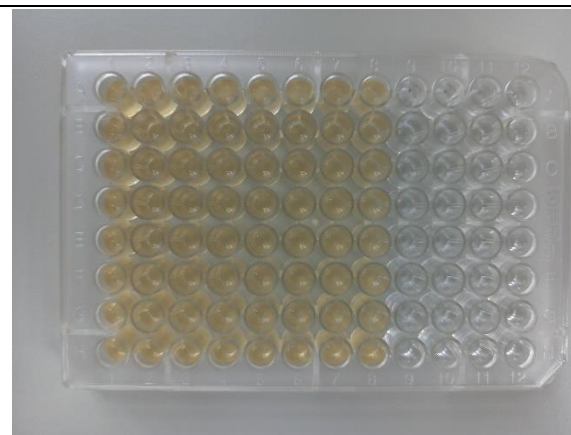*Streptococcus salivarius*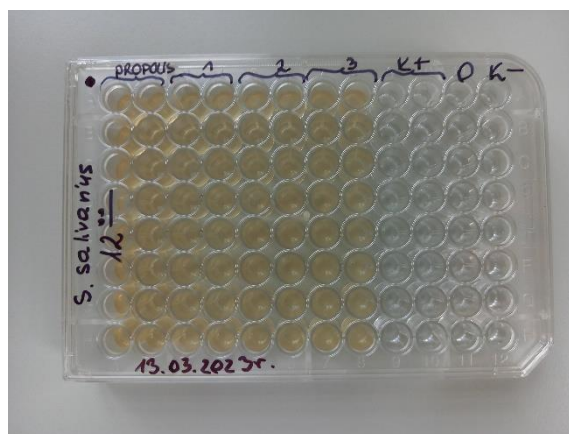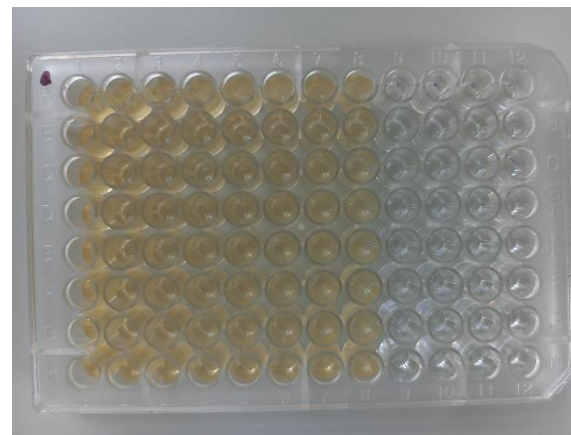

**Disclaimer/Publisher's Note:** The statements, opinions and data contained in all publications are solely those of the individual author(s) and contributor(s) and not of MDPI and/or the editor(s). MDPI and/or the editor(s) disclaim responsibility for any injury to people or property resulting from any ideas, methods, instructions or products referred to in the content.
